# Supplementary material for: Development and Evaluation of a Peptide Heterodimeric Tracer Targeting CXCR4 and Integrin αvβ3 for Pancreatic Cancer Imaging
Source: MDPI journal article supplement (doi:10.3390/pharmaceutics14091791), 2022-08-26
Supplement: s1 [file s1]

## Supplementary materials

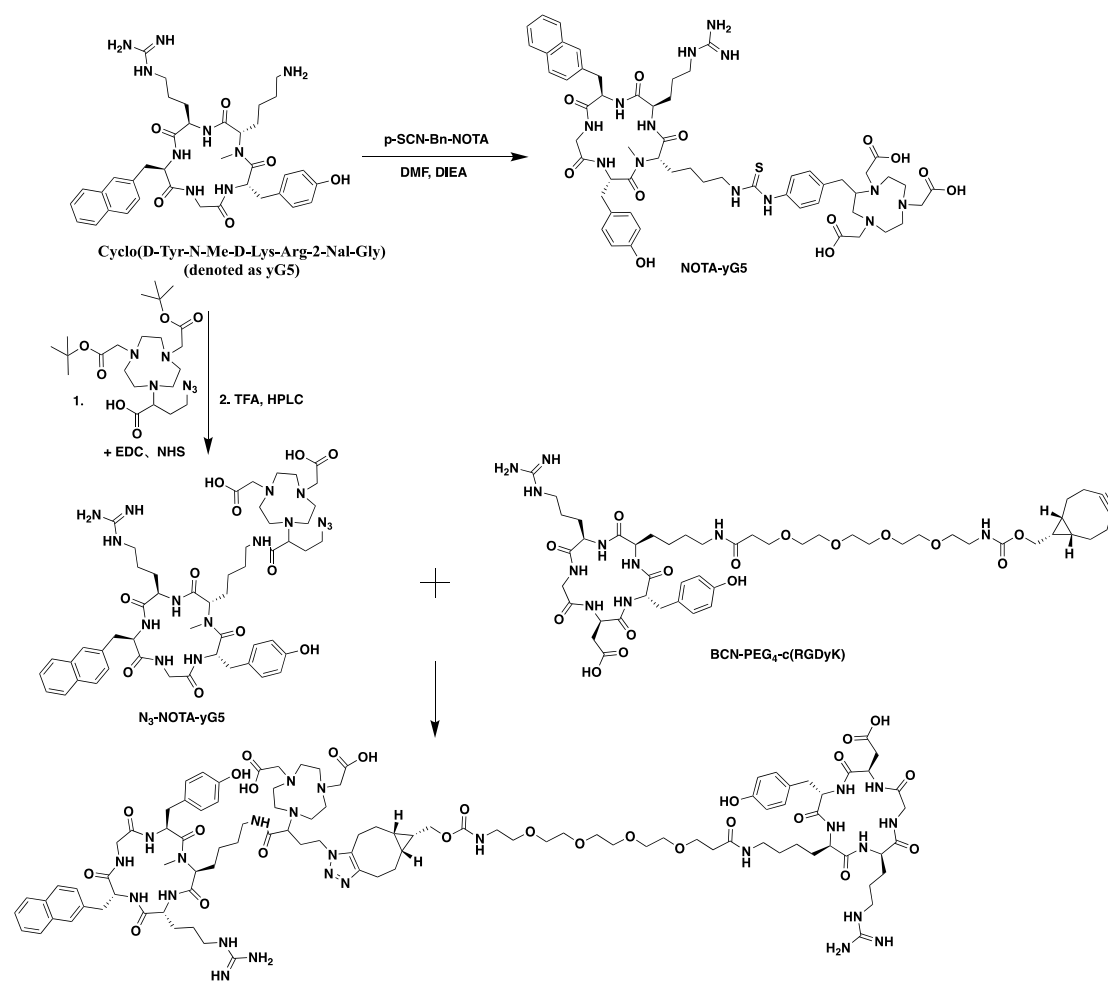

**Scheme S1.** Synthesis route of NOTA-yG5 and NOTA-yG5-RGD.

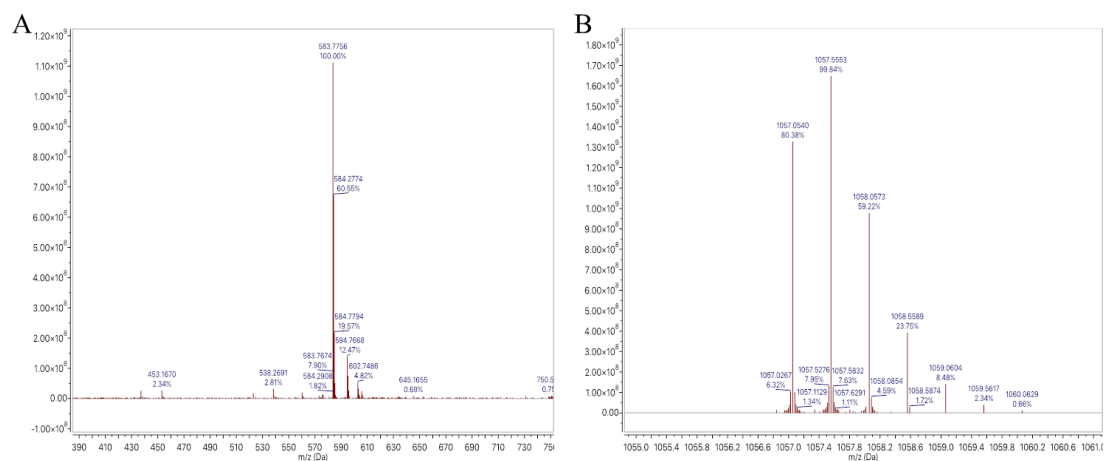

**Figure S1.** Mass spectra of NOTA-yG5 (A) and NOTA-yG5-RGD (B).

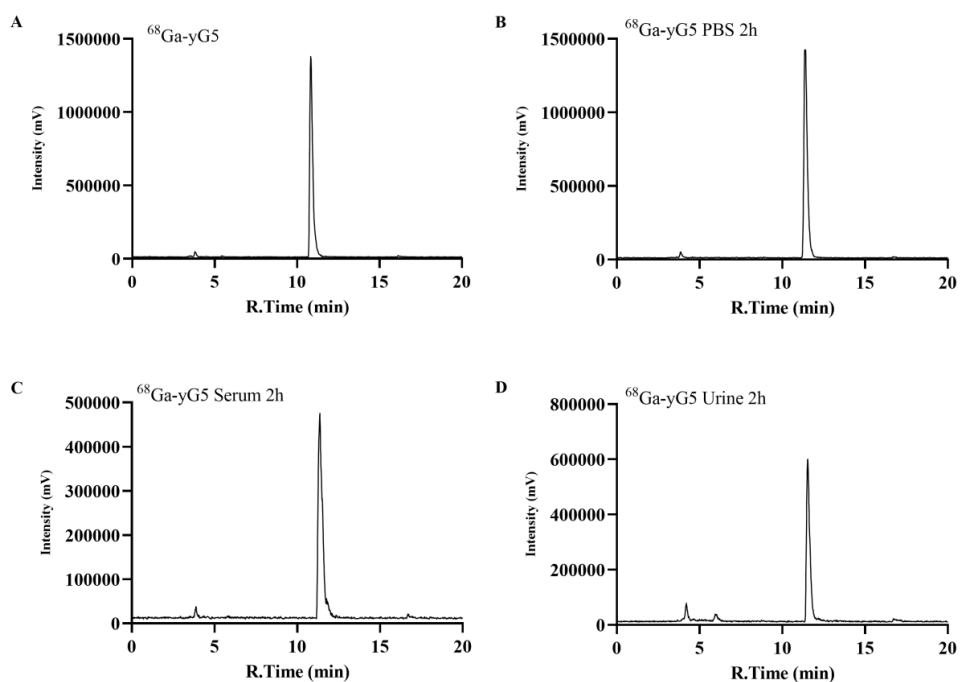

**Figure S2.** Identification and stability study of  $^{68}\text{Ga}$ -yG5. Analytic radio-HPLC chromatograms of  $^{68}\text{Ga}$ -yG5 (A). 2 h *in vitro* stability of  $^{68}\text{Ga}$ -yG5 in PBS (B), and serum (C). 2 h *in vivo* stability of  $^{68}\text{Ga}$ -yG5 in urine (D).

**Table S1.** Biodistribution results of  $^{68}\text{Ga}$ -yG5-RGD,  $^{68}\text{Ga}$ -yG5 and  $^{68}\text{Ga}$ -RGD in BxPC3 xenograft mice at 90 min p.i.

| organs \ probes | $^{68}\text{Ga}$ -yG5-RGD | $^{68}\text{Ga}$ -yG5 | $^{68}\text{Ga}$ -RGD |
|-----------------|---------------------------|-----------------------|-----------------------|
| blood           | 0.18±0.03                 | 0.45±0.07             | 0.11±0.02             |
| brain           | 0.02±0.00                 | 0.03±0.00             | 0.02±0.00             |
| heart           | 0.34±0.04                 | 0.35±0.05             | 0.35±0.06             |
| lung            | 0.85±0.06                 | 0.87±0.12             | 0.34±0.03             |
| liver           | 5.58±0.24                 | 7.08±0.88             | 1.27±0.15             |
| spleen          | 1.15±0.41                 | 1.49±0.13             | 0.59±0.08             |
| kidney          | 2.89±0.40                 | 2.67±0.10             | 1.58±0.11             |
| stomach         | 0.85±0.07                 | 0.76±0.06             | 0.84±0.04             |
| small intestine | 0.68±0.34                 | 1.35±0.19             | 0.71±0.03             |
| large intestine | 0.70±0.06                 | 0.63±0.10             | 0.74±0.04             |
| muscle          | 0.19±0.02                 | 0.24±0.05             | 0.14±0.02             |

|                     |            |              |                         |
|---------------------|------------|--------------|-------------------------|
| bone                | 0.56±0.08  | 0.41±0.04    | 0.31±0.06               |
| tumor               | 2.54±0.44  | 0.90±0.18**  | 1.21±0.06**             |
| pancreas            | 0.20±0.02  | 0.21±0.00    | 0.27±0.07               |
| <b>uptake ratio</b> |            |              |                         |
| tumor/blood         | 14.48±0.80 | 2.01±0.43*** | 10.76±2.04*             |
| tumor/muscle        | 13.58±0.81 | 3.86±1.29*** | 8.61±0.61**             |
| tumor/kidney        | 0.90±0.29  | 0.34±0.06*   | 0.77±0.06 <sup>ns</sup> |
| tumor/liver         | 0.46±0.10  | 0.13±0.04*   | 0.96±0.15 <sup>ns</sup> |

(Note: each 5.55–7.4 MBq. Data are presented as mean ± SD (%ID/g, n = 4). ns  $P > 0.05$ , \* $P < 0.05$ , \*\* $P < 0.01$ , \*\*\* $P < 0.001$ )

**Table S2.** Biodistribution results of *in vivo* blocking assays.

| <b>organs</b><br><b>blocking</b> | <b>AMD3100</b><br><b>blocking</b> | <b>RGD</b><br><b>blocking</b> | <b>Dual</b><br><b>blocking</b> |
|----------------------------------|-----------------------------------|-------------------------------|--------------------------------|
| blood                            | 0.15±0.02                         | 0.25±0.03                     | 0.34±0.06                      |
| brain                            | 0.02±0.01                         | 0.01±0.00                     | 0.02±0.00                      |
| heart                            | 0.22±0.05                         | 0.16±0.05                     | 0.48±0.07                      |
| lung                             | 0.67±0.25                         | 1.01±0.31                     | 0.80±0.32                      |
| liver                            | 4.46±0.73                         | 5.59±1.06                     | 2.78±0.19                      |
| spleen                           | 0.76±0.10                         | 0.70±0.08                     | 0.75±0.09                      |
| kidney                           | 1.93±0.25                         | 2.04±0.31                     | 3.29±0.69                      |
| stomach                          | 0.63±0.15                         | 0.26±0.11                     | 0.57±0.08                      |
| small intestine                  | 0.35±0.08                         | 0.22±0.03                     | 0.52±0.11                      |
| large intestine                  | 0.45±0.08                         | 0.27±0.08                     | 0.53±0.12                      |
| muscle                           | 0.14±0.05                         | 0.14±0.06                     | 0.28±0.08                      |
| bone                             | 0.49±0.05                         | 0.50±0.06                     | 0.81±0.18                      |
| tumor                            | 0.89±0.28**                       | 0.47±0.05**                   | 0.37±0.07**                    |
| pancreas                         | 0.16±0.03                         | 0.10±0.03                     | 0.25±0.06                      |

(Note: Each mouse was co-injected of excess amount of unlabeled AMD3100 (10mg/kg), RGD (10mg/kg), and AMD3100 (10mg/kg) + RGD (10mg/kg) at 30 min p.i. each 5.55–7.4 MBq. Data

are presented as mean  $\pm$  SD (%ID/g, n = 4). ns  $P>0.05$ , \*\* $P<0.01$ )

**Table S3.** Biodistribution results of  $^{68}\text{Ga}$ -yG5-RGD in BxPC3 and MX-1 xenograft mice at 90 min p.i.

| <del>organs</del> | <del>models</del> | BxPC3           | MX-1               |
|-------------------|-------------------|-----------------|--------------------|
|                   | blood             | 0.18 $\pm$ 0.03 | 0.15 $\pm$ 0.03    |
|                   | brain             | 0.02 $\pm$ 0.00 | 0.03 $\pm$ 0.01    |
|                   | heart             | 0.34 $\pm$ 0.04 | 0.42 $\pm$ 0.09    |
|                   | lung              | 0.85 $\pm$ 0.06 | 0.86 $\pm$ 0.21    |
|                   | liver             | 5.58 $\pm$ 0.24 | 6.08 $\pm$ 0.96    |
|                   | spleen            | 1.15 $\pm$ 0.41 | 1.39 $\pm$ 0.23    |
|                   | kidney            | 2.89 $\pm$ 0.40 | 4.30 $\pm$ 0.84    |
|                   | stomach           | 0.85 $\pm$ 0.07 | 1.15 $\pm$ 0.28    |
|                   | small intestine   | 0.68 $\pm$ 0.34 | 0.76 $\pm$ 0.18    |
|                   | large intestine   | 0.70 $\pm$ 0.06 | 0.83 $\pm$ 0.13    |
|                   | muscle            | 0.19 $\pm$ 0.02 | 0.27 $\pm$ 0.06    |
|                   | bone              | 0.56 $\pm$ 0.08 | 0.87 $\pm$ 0.19    |
|                   | tumor             | 2.54 $\pm$ 0.44 | 0.42 $\pm$ 0.11*** |
|                   | pancreas          | 0.20 $\pm$ 0.02 | 0.22 $\pm$ 0.05    |

(Note: each 5.55–7.4 MBq. Data are presented as mean  $\pm$  SD (%ID/g, n = 4). ns  $P>0.05$ , \*\*\* $P<0.001$ )
